# Supplementary material for: Evaluation of Antioxidant, Anti-Inflammatory and Cytoprotective Properties of Ethanolic Mint Extracts from Algeria on 7-Ketocholesterol-Treated Murine RAW 264.7 Macrophages
Source: MDPI journal article supplement (doi:10.3390/antiox7120184), 2018-12-06
Supplement: s1 [file s1]

**Supplementary Table S1.** Effect of mint extracts on cytokine secretion.

| Samples         | IL-6<br>(pg/mL)      | IL-10<br>(pg/mL)   | MCP-1<br>(pg/mL)        | IFN- $\gamma$<br>(pg/mL) | TNF- $\alpha$<br>(pg/mL) |
|-----------------|----------------------|--------------------|-------------------------|--------------------------|--------------------------|
| Ctl             | ND                   | ND                 | 3,525.2 $\pm$ 176.3     | ND                       | 754.4 $\pm$ 37.8         |
| Vehicle         | ND                   | ND                 | 4,345.8 $\pm$ 217.3     | ND                       | 879.5 $\pm$ 43.9         |
| LPS             | 423.1 $\pm$ 21.2 *   | 156.7 $\pm$ 7.8 *  | 5,347.4 $\pm$ 267.5 *   | ND                       | 4,974.3 $\pm$ 248.5 *    |
| 7KC20           | ND                   | ND                 | 4,456.0 $\pm$ 222.8     | ND                       | 5,136.3 $\pm$ 256.8 #    |
| 7KC20+LPS       | 604.5 $\pm$ 30.3 §   | ND                 | 24,667.5 $\pm$ 1233.3 § | ND                       | 15,162.5 $\pm$ 758.0 §   |
| MS200           | ND                   | 45.5 $\pm$ 2.3 *   | 12,148.5 $\pm$ 607.3 *  | ND                       | 5,975.0 $\pm$ 298.8 *    |
| MS400           | ND                   | 38.1 $\pm$ 1.9 *   | 10,939.8 $\pm$ 546.8 *  | ND                       | 7,828.5 $\pm$ 391.5 *    |
| MP200           | ND                   | ND                 | 13,904.5 $\pm$ 4171.1 * | ND                       | 8,645.0 $\pm$ 432.3 *    |
| MP400           | ND                   | 31.6 $\pm$ 1.6 *   | 6,302.2 $\pm$ 315.0 *   | ND                       | 6,596.8 $\pm$ 329.8 *    |
| MR200           | ND                   | ND                 | 5,395.3 $\pm$ 269.8 *   | ND                       | 2,519.3 $\pm$ 126.0 *    |
| MR400           | ND                   | ND                 | 2,986.8 $\pm$ 149.3 *   | ND                       | 3,447.8 $\pm$ 172.3 *    |
| MS200+LPS       | 90.0 $\pm$ 4.5 **    | 12.0 $\pm$ 0.6 **  | 4,106.3 $\pm$ 20.3 **   | ND                       | 4,579.0 $\pm$ 228.7      |
| MS400+LPS       | 39.8 $\pm$ 2.0 **    | 78.0 $\pm$ 3.9 **  | 5,299.5 $\pm$ 264.7     | ND                       | 4467.7 $\pm$ 223.2       |
| MP200+LPS       | 94.5 $\pm$ 4.8 **    | 46.3 $\pm$ 2.3 **  | 2,610.0 $\pm$ 130.5 **  | ND                       | 3,775.7 $\pm$ 188.7 **   |
| MP400+LPS       | 39.0 $\pm$ 1.9 **    | ND                 | 2,988.7 $\pm$ 149.2 **  | ND                       | 2,745.0 $\pm$ 137.2 **   |
| MR200+LPS       | 106.8 $\pm$ 5.2 **   | 10.3 $\pm$ 0.5 **  | 4,469.5 $\pm$ 223.5 **  | ND                       | 4,473.2 $\pm$ 223.5      |
| MR400+LPS       | 50.8 $\pm$ 2.5 **    | 15.7 $\pm$ 0.8 **  | 7,824.0 $\pm$ 391       | ND                       | 2,955.2 $\pm$ 148.7 **   |
| MS200+7KC20     | 6.3 $\pm$ 0.3 ##     | ND                 | 1,336.0 $\pm$ 668.0     | 6.3 $\pm$ 0.3##          | 14,198 $\pm$ 709.7 ##    |
| MS400+7KC20     | 6.3 $\pm$ 0.3 ##     | 42.5 $\pm$ 2.1 ##  | 8,156.0 $\pm$ 407.7     | 7.5 $\pm$ 0.3##          | 11,096.0 $\pm$ 554.7 ##  |
| MP200+7KC20     | 6.8 $\pm$ 0.4 ##     | ND                 | 10,567.2 $\pm$ 528.2    | ND                       | 17,577.5 $\pm$ 878.7 ##  |
| MP400+7KC20     | 6.2 $\pm$ 0.3 ##     | ND                 | 6,605.8 $\pm$ 330.2     | ND                       | 17,985.5 $\pm$ 899.2 ##  |
| MR200+7KC20     | ND                   | ND                 | 9,740.2 $\pm$ 487.0     | 4.1 $\pm$ 0.2##          | 10,479.0 $\pm$ 523.7 ##  |
| MR400+7KC20     | ND                   | ND                 | 5,850.5 $\pm$ 292.5     | 4.5 $\pm$ 0.2##          | 10,340.2 $\pm$ 517.0.##  |
| MS200+7KC20+LPS | 1000.8 $\pm$ 50.0 §§ | 128.3 $\pm$ 6.5 §§ | 32,568.0 $\pm$ 1628.25  | 3.8 $\pm$ 0.1 §§         | 14,314.7 $\pm$ 715.5     |
| MS400+7KC20+LPS | 563.5 $\pm$ 28.0     | 56.2 $\pm$ 2.8 §§  | 15,428 $\pm$ 771.2      | ND                       | 6,816.5 $\pm$ 340.7      |
| MP200+7KC20+LPS | 653.8 $\pm$ 32.8     | ND                 | 22,541.0 $\pm$ 1127.0   | 4.0 $\pm$ 0.2 §§         | 968.5 $\pm$ 484.2        |
| MP400+7KC20+LPS | 287.5 $\pm$ 14.5 §§  | ND                 | 8,726.0 $\pm$ 436.2     | ND                       | 3,603.7 $\pm$ 180.0 §§   |
| MR200+7KC20+LPS | 463.5 $\pm$ 23.2 §§  | ND                 | 25,167.2 $\pm$ 1258.2   | 4.2 $\pm$ 0.2 §§         | 7,294.2 $\pm$ 364.5      |
| MR400+7KC20+LPS | 124.0 $\pm$ 6.3 §§   | 17.4 $\pm$ 0.9 §§  | 17,011.5 $\pm$ 850.5    | 3.5 $\pm$ 0.1 §§         | 5,551.5 $\pm$ 27.5       |

Data shown are mean  $\pm$  SD from three independent experiments. They were analyzed by the ANOVA's test followed by a t test. A P value of 0.05 or less was considered as statistically significant ( $p < 0.05$ ). No significant differences were observed between control (Ctl; untreated cells) and vehicle (ethanol 0.1%). \*: comparison LPS, MS, MP and MR extracts versus Ctl; #: comparison 7KC20 versus vehicle; §: comparison (7KC20 + LPS) versus vehicle; \*\*: comparison (MS, MP or MR extracts + LPS) versus LPS; ##: comparison (MS, MP or MR extracts + 7KC20) versus 7KC20; §§: comparison (MS, MP or MR extracts + 7KC20 + LPS) versus (7KC20 + LPS). Cytokine values lower than the limit of detection (IL-6: 5 pg/mL; IL-10: 17.5 pg/mL; MCP-1: 52.7 pg/mL; IFN- $\gamma$ : 2.5 pg/mL; TNF $\alpha$ : 7.3 pg/mL) were noted as not detectable. ND: not detectable.

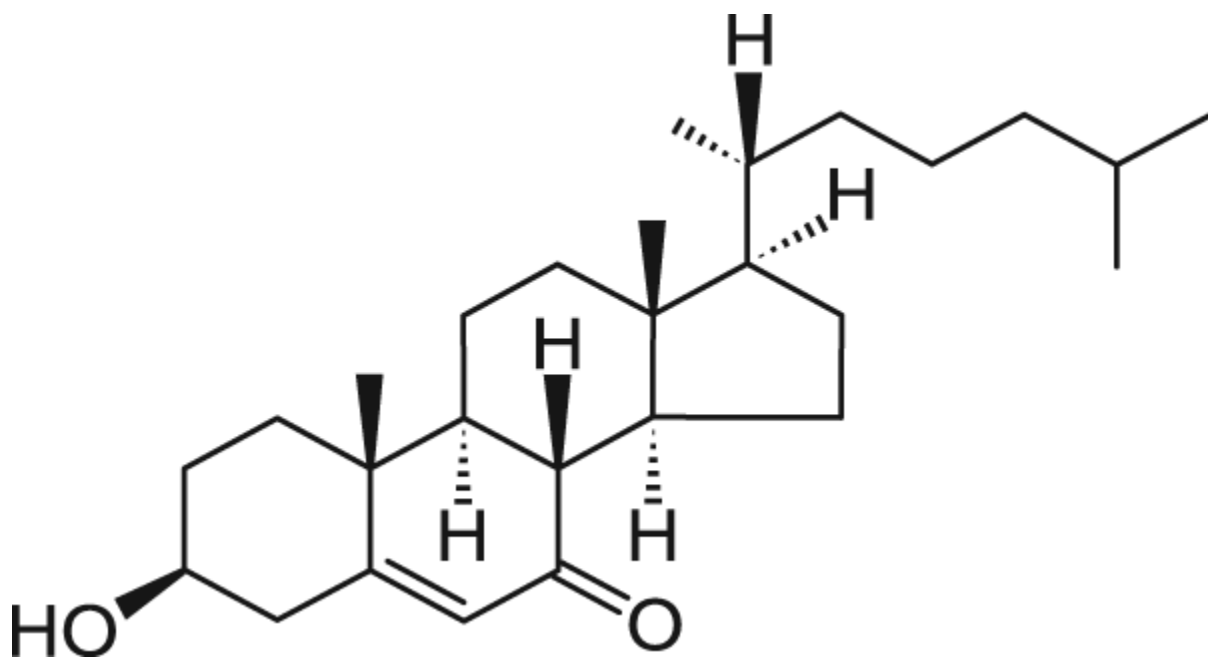

Supplementary Figure S1. 7-ketocholesterol (7KC) structure.
